# Supplementary material
Source: PubMed Central journal article supplement (PMC6104655)
Supplement: NIHMS982689-supplement-Supp.pdf [file NIHMS982689-supplement-Supp.pdf]

Supplement of Geosci. Model Dev., 10, 1587–1605, 2017  
<http://www.geosci-model-dev.net/10/1587/2017/>  
doi:10.5194/gmd-10-1587-2017-supplement  
© Author(s) 2017. CC Attribution 3.0 License.

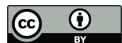

*Supplement of*

## **A framework for expanding aqueous chemistry in the Community Multiscale Air Quality (CMAQ) model version 5.1**

**Kathleen M. Fahey et al.**

*Correspondence to:* Kathleen M. Fahey (fahey.kathleen@epa.gov)

The copyright of individual parts of the supplement might differ from the CC-BY 3.0 licence.

5 **Table S1. Gas phase species\* that participate in phase transfer and associated gas phase diffusion and accommodation coefficients. Unless otherwise indicated, Henry’s Law coefficients are the base model’s original values (from CMAQ subroutine hlconst.F).**

| Reaction                                                                 | $H_{law}$ (M/atm)    | $-\Delta H/R$ (K) | $\alpha^a$               | $D_g$ (m <sup>2</sup> /s) x 10 <sup>5b</sup> |
|--------------------------------------------------------------------------|----------------------|-------------------|--------------------------|----------------------------------------------|
| SO <sub>2</sub> (gas) ↔ SO <sub>2</sub> (aq)                             | 1.4                  | 2.9E+03           | 1.10 x 10 <sup>-1</sup>  | 1.28                                         |
| HNO <sub>3</sub> (gas) ↔ HNO <sub>3</sub> (aq)                           | 2.1E+05              | 8.7E+03           | 8.68 x 10 <sup>-2</sup>  | 1.32                                         |
| CO <sub>2</sub> (gas) ↔ H <sub>2</sub> CO <sub>3</sub> (aq)              | 3.6E-02              | 2.2E+03           | 1.50 x 10 <sup>-4</sup>  | 1.55                                         |
| NH <sub>3</sub> (gas) ↔ NH <sub>4</sub> OH (aq)                          | 6.1E+01              | 4.2E+03           | 9.10 x 10 <sup>-2</sup>  | 2.30                                         |
| H <sub>2</sub> O <sub>2</sub> (gas) ↔ H <sub>2</sub> O <sub>2</sub> (aq) | 8.3E+04              | 7.4E+03           | 1.53 x 10 <sup>-1</sup>  | 1.46                                         |
| O <sub>3</sub> (gas) ↔ O <sub>3</sub> (aq)                               | 1.14E-02             | 2.3E+03           | 1.00 x 10 <sup>-1</sup>  | 1.48                                         |
| HCOOH (gas) ↔ HCOOH (aq)                                                 | 8.9E+03              | 6.1E+03           | 2.29 x 10 <sup>-2</sup>  | 1.53                                         |
| MHP (gas) ↔ MHP (aq)                                                     | 3.1E+02              | 5.2E+03           | 6.76 x 10 <sup>-3</sup>  | 1.31                                         |
| PAA (gas) ↔ PAA (aq)                                                     | 8.4E+02              | 5.3E+03           | 1.90 x 10 <sup>-2</sup>  | 1.02                                         |
| HCl (gas) ↔ HCl (aq)                                                     | 1.9E+01              | 6.0E+02           | 1.16 x 10 <sup>-1</sup>  | 1.89                                         |
| GLY (gas) ↔ GLY (aq)                                                     | 3.6E+05              |                   | 2.30 x 10 <sup>-2c</sup> | 1.15 <sup>a</sup>                            |
| MGLY (gas) ↔ MGLY (aq)                                                   | 3.2E+04 <sup>e</sup> |                   | 2.30 x 10 <sup>-2c</sup> | 1.15 <sup>d</sup>                            |
| IEPOX (gas) ↔ IEPOX (aq)                                                 | 2.7E+06 <sup>f</sup> |                   | 2.00 x 10 <sup>-2f</sup> | 1.00 <sup>f</sup>                            |
| MAE (gas) ↔ MAE (aq)                                                     | 1.2E+05 <sup>f</sup> |                   | 2.00 x 10 <sup>-2f</sup> | 1.00 <sup>f</sup>                            |
| HMML (gas) ↔ HMML (aq)                                                   | 1.2E+05 <sup>f</sup> |                   | 2.00 x 10 <sup>-2f</sup> | 1.00 <sup>f</sup>                            |

\*H<sub>2</sub>SO<sub>4</sub> is instantaneously transferred to aerosol SO<sub>4</sub> and N<sub>2</sub>O<sub>5</sub> to HNO<sub>3</sub> (gas) at the start of cloud processing. <sup>a</sup>CAPRAM 2.4 tables ([http://projects.tropos.de/capram/capram\\_24.html](http://projects.tropos.de/capram/capram_24.html))\*. <sup>b</sup>Herrmann et al. (2000)\*. <sup>c</sup>Lim et al. (2005)\*. <sup>d</sup>Assumed equal to D<sub>g</sub> for glyoxal. <sup>e</sup>The Henry’s Law coefficient for methylglyoxal is replaced with that of glyoxal when the CB05 gas phase mechanism is used (Carlton et al., 2010). <sup>f</sup>Pye et al. (2013). \*and the original sources therein

10

**Table S2. Dissociation reactions and equilibrium constants. Ionic species are considered explicitly and dissociation equilibrium reactions are described as a set of forward and backward reactions. Activity coefficients are rolled into the forward and backward reaction rates.**

| Reaction                                                                        | $K_{eq,298}^a$ [M]      | $-\Delta E_a/R$ [K] <sup>#</sup> | $k_b^{a,d}$ [M <sup>-1</sup> s <sup>-1</sup> ] |
|---------------------------------------------------------------------------------|-------------------------|----------------------------------|------------------------------------------------|
| SO <sub>2</sub> ↔ HSO <sub>3</sub> <sup>-</sup> + H <sup>+</sup>                | 1.39x10 <sup>-2</sup>   | 1.87x10 <sup>3</sup>             | 2.0x10 <sup>8</sup>                            |
| HSO <sub>3</sub> <sup>-</sup> ↔ SO <sub>3</sub> <sup>2-</sup> + H <sup>+</sup>  | 6.72x10 <sup>-8</sup>   | 3.55x10 <sup>2</sup>             | 5.0x10 <sup>10</sup>                           |
| HNO <sub>3</sub> ↔ NO <sub>3</sub> <sup>-</sup> + H <sup>+</sup>                | 1.7x10 <sup>1</sup>     |                                  | 5.0x10 <sup>10</sup>                           |
| NH <sub>4</sub> OH ↔ NH <sub>4</sub> <sup>+</sup> + OH <sup>-</sup>             | 1.77x10 <sup>-5</sup>   | -7.10x10 <sup>2</sup>            | 3.4x10 <sup>10</sup>                           |
| H <sub>2</sub> CO <sub>3</sub> ↔ HCO <sub>3</sub> <sup>-</sup> + H <sup>+</sup> | 4.3x10 <sup>-7</sup>    | -9.95x10 <sup>2</sup>            | 6.4x10 <sup>4</sup>                            |
| HCO <sub>3</sub> <sup>-</sup> ↔ CO <sub>3</sub> <sup>2-</sup> + H <sup>+</sup>  | 4.68x10 <sup>-11</sup>  | -1.79x10 <sup>3</sup>            | 5.0x10 <sup>10</sup>                           |
| HCOOH ↔ HCOO <sup>-</sup> + H <sup>+</sup>                                      | 1.8x10 <sup>-4 b</sup>  | -2.00x10 <sup>1</sup>            | 5.0x10 <sup>10</sup>                           |
| HCl ↔ Cl <sup>-</sup> + H <sup>+</sup>                                          | 1.74x10 <sup>6 b</sup>  | 6.90x10 <sup>3</sup>             | 5.0x10 <sup>10</sup>                           |
| H <sub>2</sub> O ↔ OH <sup>-</sup> + H <sup>+</sup>                             | 1.8x10 <sup>-16 c</sup> | -6.95x10 <sup>3</sup>            | 1.4x10 <sup>11</sup>                           |
| H <sub>2</sub> SO <sub>4</sub> ↔ HSO <sub>4</sub> <sup>-</sup> + H <sup>+</sup> | 1.0x10 <sup>3 b</sup>   |                                  | 5.0x10 <sup>10</sup>                           |
| HSO <sub>4</sub> <sup>-</sup> ↔ SO <sub>4</sub> <sup>2-</sup> + H <sup>+</sup>  | 1.02x10 <sup>-2</sup>   | 2.45x10 <sup>3</sup>             | 1.0x10 <sup>11</sup>                           |

<sup>a</sup>Warneck and Williams (2012)\*. <sup>b</sup>Seinfeld and Pandis(2006)\*. <sup>c</sup>Removed [H<sub>2</sub>O] concentration of 55.5 M from the original equilibrium constant. <sup>d</sup>Graedel and Weschler (1981)\*. \*and the original sources therein

15

$k_r = K_{eq,i,T} \times k_b$  <sup>#</sup>Note that while there are some minor differences between some of the equilibrium constants used here compared to AQCHEM, box model tests indicate that these small differences only have a minimal impact on predicted concentrations

20

**Table S3. Chemical kinetic reactions.**

| Reaction                                                                                                                          | Rate coefficient in appropriate units of M,s (298K); -E <sub>a</sub> /R (K) <sup>§</sup> |                                                   | Notes                                            |
|-----------------------------------------------------------------------------------------------------------------------------------|------------------------------------------------------------------------------------------|---------------------------------------------------|--------------------------------------------------|
| HSO <sub>3</sub> <sup>-</sup> + H <sub>2</sub> O <sub>2</sub> + H <sup>+</sup> → SO <sub>4</sub> <sup>2-</sup> + 2 H <sup>+</sup> | 7.45E+7 / (1 + 13 [H+]); -4756.08                                                        |                                                   |                                                  |
| SO <sub>2</sub> + O <sub>3</sub> → SO <sub>4</sub> <sup>2-</sup> + 2 H <sup>+</sup>                                               | 2.4E+4; 0.0                                                                              |                                                   | Q                                                |
| HSO <sub>3</sub> <sup>-</sup> + O <sub>3</sub> → SO <sub>4</sub> <sup>2-</sup> + H <sup>+</sup>                                   | 3.7E+5; -5530.88                                                                         |                                                   | Q                                                |
| SO <sub>3</sub> <sup>2-</sup> + O <sub>3</sub> → SO <sub>4</sub> <sup>2-</sup>                                                    | 1.5E+9; -5280.56                                                                         |                                                   | Q                                                |
| HSO <sub>3</sub> <sup>-</sup> + MHP + H <sup>+</sup> → SO <sub>4</sub> <sup>2-</sup> + 2 H <sup>+</sup>                           | 1.9E+7; -3799.5                                                                          |                                                   |                                                  |
| *HSO <sub>3</sub> <sup>-</sup> + PAA + H <sup>+</sup> → SO <sub>4</sub> <sup>2-</sup> + 2 H <sup>+</sup>                          | 3.6E+7; -3999.2                                                                          |                                                   | *                                                |
| *HSO <sub>3</sub> <sup>-</sup> + PAA → SO <sub>4</sub> <sup>2-</sup> + H <sup>+</sup>                                             | 7E+2; 0.0                                                                                |                                                   |                                                  |
| SO <sub>2</sub> (+ Mn(II)) → SO <sub>4</sub> <sup>2-</sup> + 2 H <sup>+</sup>                                                     | 7.5E+2; 0.0                                                                              |                                                   | #                                                |
| HSO <sub>3</sub> <sup>-</sup> (+ Mn(II)) → SO <sub>4</sub> <sup>2-</sup> + H <sup>+</sup>                                         | 7.5E+2; 0.0                                                                              |                                                   | #                                                |
| SO <sub>3</sub> <sup>2-</sup> (+ Mn(II)) → SO <sub>4</sub> <sup>2-</sup>                                                          | 7.5E+2; 0.0                                                                              |                                                   | #                                                |
| SO <sub>2</sub> (+ Fe(III)) → SO <sub>4</sub> <sup>2-</sup> + 2 H <sup>+</sup>                                                    | 2.6E+3; 0.0                                                                              |                                                   | #                                                |
| HSO <sub>3</sub> <sup>-</sup> (+ Fe(III)) → SO <sub>4</sub> <sup>2-</sup> + H <sup>+</sup>                                        | 2.6E+3; 0.0                                                                              |                                                   | #                                                |
| SO <sub>3</sub> <sup>2-</sup> (+ Fe(III)) → SO <sub>4</sub> <sup>2-</sup>                                                         | 2.6E+3; 0.0                                                                              |                                                   | #                                                |
| SO <sub>2</sub> (+Mn(II) + Fe(III)) → SO <sub>4</sub> <sup>2-</sup> + 2 H <sup>+</sup>                                            | 1E+10; 0.0                                                                               |                                                   | #                                                |
| HSO <sub>3</sub> <sup>-</sup> (+ Mn(II) + Fe(III)) → SO <sub>4</sub> <sup>2-</sup> + H <sup>+</sup>                               | 1E+10; 0.0                                                                               |                                                   | #                                                |
| SO <sub>3</sub> <sup>2-</sup> (+ Mn(II) + Fe(III)) → SO <sub>4</sub> <sup>2-</sup>                                                | 1E+10; 0.0                                                                               |                                                   | #                                                |
| GLY + OH• → 0.04 ORGC                                                                                                             | 3E+10; 0.0                                                                               |                                                   | Fixed OH•                                        |
| MGLY + OH• → 0.04 ORGC                                                                                                            | 3E+10; 0.0                                                                               |                                                   | Fixed OH•                                        |
|                                                                                                                                   | k <sub>1</sub> (M <sup>-2</sup> s <sup>-1</sup> )                                        | k <sub>2</sub> (M <sup>-2</sup> s <sup>-1</sup> ) |                                                  |
| IEPOX + H <sub>2</sub> O → 2-methyltetrol                                                                                         | 9E-04                                                                                    | 1.3E-05                                           | Rate = KIEPOX * Parent                           |
| IEPOX + SO <sub>4</sub> <sup>2-</sup> → IEPOX_OS                                                                                  | 2E-04                                                                                    | 2.9E-06                                           | Hydrocarbon *                                    |
| IEPOX + NO <sub>3</sub> <sup>-</sup> → IEPOX_ON <sup>§</sup>                                                                      | 2E-04                                                                                    | 2.9E-06                                           | Nucleophile * Q                                  |
| IEPOX + 2-methyltetrol → dimers                                                                                                   | 2E-04                                                                                    | 2.9E-06                                           | where                                            |
| IEPOX + IEPOX_OS → dimers                                                                                                         | 2E-04                                                                                    | 2.9E-06                                           |                                                  |
| IEPOX + IEPOX_ON → dimers <sup>§</sup>                                                                                            | 2E-04                                                                                    | 2.9E-06                                           | KIEPOX = k <sub>1</sub> *[H <sup>+</sup> ] +     |
| MAE + H <sub>2</sub> O → 2-MG                                                                                                     | 9E-04                                                                                    | 1.3E-05                                           | k <sub>2</sub> *[HSO <sub>4</sub> <sup>-</sup> ] |
| MAE + SO <sub>4</sub> <sup>2-</sup> → MPAN_OS                                                                                     | 2E-04                                                                                    | 2.9E-06                                           |                                                  |
| MAE + NO <sub>3</sub> <sup>-</sup> → MPAN_ON <sup>§</sup>                                                                         | 2E-04                                                                                    | 2.9E-06                                           |                                                  |
| MAE + 2-MG → dimers <sup>§</sup>                                                                                                  | 2E-04                                                                                    | 2.9E-06                                           | H <sub>2</sub> O concentration                   |
| MAE + MPAN_OS → dimers <sup>§</sup>                                                                                               | 2E-04                                                                                    | 2.9E-06                                           | remains fixed (55.5 M)                           |
| MAE + MPAN_ON → dimers <sup>§</sup>                                                                                               | 2E-04                                                                                    | 2.9E-06                                           |                                                  |
| HMML + H <sub>2</sub> O → 2-MG                                                                                                    | 9E-04                                                                                    | 1.3E-05                                           |                                                  |
| HMML + SO <sub>4</sub> <sup>2-</sup> → MPAN_OS                                                                                    | 2E-04                                                                                    | 2.9E-06                                           |                                                  |
| HMML + NO <sub>3</sub> <sup>-</sup> → MPAN_ON <sup>§</sup>                                                                        | 2E-04                                                                                    | 2.9E-06                                           |                                                  |
| HMML + 2-MG → dimers <sup>§</sup>                                                                                                 | 2E-04                                                                                    | 2.9E-06                                           |                                                  |
| HMML + MPAN_OS → dimers <sup>§</sup>                                                                                              | 2E-04                                                                                    | 2.9E-06                                           |                                                  |
| HMML + MPAN_ON → dimers <sup>§</sup>                                                                                              | 2E-04                                                                                    | 2.9E-06                                           |                                                  |

<sup>§</sup>Rate coefficients are equal to those used in the standard version of AQCHEM. <sup>Q</sup>Aqueous diffusion correction factor applied; <sup>\*</sup>included here as two reactions to accommodate the original single rate expression which included pH dependent and pH independent elements. <sup>#</sup>A S(VI) inhibition factor of the following form is applied to these reaction rates: (1+75[S(VI)]<sup>0.67</sup>)<sup>-1</sup>. (Species in parentheses on the left hand side of the rate expression indicate species that affect the reaction rate calculation but whose concentrations are not consumed in the reaction.) <sup>§</sup>Included here but not included in the version of AQCHEM-KMTI released with CMAQv5.1

5

Table S4. CMAQ species and local AQCHEM-KMT(I) species. The “G”, “L”, “A”, and “WD” prefixes in column 1 refer to the gas-phase, aqueous-phase, Aitken aerosol, and wet deposition portion of the species respectively. Shaded cells include species specific to AQCHEM-KMTI. CMAQ aerosol concentration and wet deposition indices are of the form: [species, mode].

| AQCHEM-KMT(I) local dynamic species | CMAQ species                                          | Name and Notes                 |
|-------------------------------------|-------------------------------------------------------|--------------------------------|
| G_SO2, L_SO2, WD_SO2                | GAS(LSO2), GASWDEP(LSO2)                              | Sulfur dioxide                 |
| G_HNO3, L_HNO3, WD_HNO3             | GAS(LHNO3)/AEROSOL(LNO3, 2/3), GASWDEP(LHNO3)         | Nitric acid, nitrate           |
| G_CO2, L_H2CO3, WD_CO2              | GAS(LCO2), GASWDEP(LCO2)                              | Carbon dioxide                 |
| G_NH3, L_NH4OH, WD_NH4OH            | GAS(LNH3), AEROSOL(LNH4, 2/3), GASWDEP(LNH3)          | Ammonia, ammonium              |
| G_H2O2, L_H2O2, WD_H2O2             | GAS(LH2O2), GASWDEP(LH2O2)                            | Hydrogen peroxide              |
| G_O3, L_O3, WD_O3                   | GAS(LO3), GASWDEP(LO3)                                | Ozone                          |
| G_HCOOH, L_HCOOH, WD_HCOOH          | GAS(LFOA), GASWDEP(LFOA)                              | Formic acid                    |
| G_MHP, L_MHP, WD_MHP                | GAS(LMHP), GASWDEP(LMHP)                              | Methylhydroperoxide (CH3OOH)   |
| G_PAA, L_PAA, WD_PAA                | GAS(LPAA), GASWDEP(LPAA)                              | peroxyacetic acid (CH3C(O)OOH) |
| G_HCL, L_HCL, WD_HCL                | GAS(HCL), GASWDEP(HCL)                                | Hydrochloric acid              |
| G_GLY, L_GLY, WD_GLY                | GAS(LGLY), GASWDEP(LGLY)                              | Glyoxal                        |
| G_MGLY, L_MGLY, WD_MGLY             | GAS(LMGLY), GASWDEP(LMGLY)                            | Methylglyoxal                  |
| A_NO3AKN                            | AEROSOL(LNO3,1)                                       | Aitken nitrate                 |
| A_NH4AKN                            | AEROSOL(LNH4,1)                                       | Aitken ammonium                |
| A_CLAKN                             | AEROSOL(LCL,1)                                        | Aitken chloride                |
| A_NAAKN                             | AEROSOL(LNA,1)                                        | Aitken sodium                  |
| A_SO4AKN                            | AEROSOL(LSO4,1)                                       | Aitken sulfate                 |
| A_PECAKN                            | AEROSOL(LEC,1)                                        | Aitken elemental carbon        |
| A_POAAKN                            | AEROSOL(LPOA,1)                                       | Aitken primary OA              |
| A_PRIAKN                            | AEROSOL(LPRI,1)                                       | Aitken other primary           |
| L_SO4MIN2, WD_H2SO4                 | AEROSOL(LSO4, 2/3), AERWDEP(LSO4, 2/3)                | Sulfate                        |
| L_NO3MIN, WD_NO3MIN                 | GAS(LHNO3), AEROSOL(LNO3, 2/3), AERWDEP(LNO3, 2/3)    | Nitrate                        |
| L_NH4PLUS, WD_NH4PLUS               | GAS(LNH3), AEROSOL(LNH4, 2 and 3), AERWDEP(LNH4, 2/3) | Ammonium                       |
| L_CLMIN, WD_CLMIN                   | AEROSOL(LCL, 2/3), AERWDEP(LCL, 2/3)                  | Chloride                       |
| L_PRIACC, WD_PRIACC                 | AEROSOL(LPRI, 2), AERWDEP(LPRI, 2)                    | Other primary                  |
| L_PECACC, WD_PECACC                 | AEROSOL(LEC, 2), AERWDEP(LEC, 2)                      | Elemental carbon               |
| L_ORGC, WD_ORGC                     | AEROSOL(LORGC, 2), AERWDEP(LORGC, 2)                  | Cloud SOA                      |
| L_POAACC, WD_POAACC                 | AEROSOL(LPOA, 2), AERWDEP(LPOA, 2)                    | Primary OA                     |
| L_HPLUS, WD_HPLUS                   | HPWDEP                                                | H <sup>+</sup>                 |
| L_OHMIN                             | --                                                    | OH <sup>-</sup>                |

|                            |                                                                                                                                                                                     |                                                                                               |
|----------------------------|-------------------------------------------------------------------------------------------------------------------------------------------------------------------------------------|-----------------------------------------------------------------------------------------------|
| L_FEPLUS3, WD_FEPLUS3%     | AEROSOL(LFEACC, 2),<br>AERWDEP(LFEACC, 2),<br>AEROSOL(LSOILC, 3),<br>AERWDEP(LSOILC, 3),<br>AEROSOL(LANTHC, 3),<br>AERWDEP(LANTHC, 3)                                               | Soluble iron <sup>(3+)</sup> ; %AQCHEM species include contributions from coarse aerosol      |
| L_MNPLUS2, WD_MNPLUS2%     | AEROSOL(LMNACC, 2),<br>AERWDEP(LMNACC, 2),<br>AEROSOL(LSOILC, 3),<br>AERWDEP(LSOILC, 3),<br>AEROSOL(LANTHC, 3),<br>AERWDEP(LANTHC, 3)                                               | Soluble manganese <sup>(2+)</sup> ; %AQCHEM species include contributions from coarse aerosol |
| L_HSO3MIN, (WD_SO2)        | GAS(LSO2)                                                                                                                                                                           | Bisulfite                                                                                     |
| L_SO3MIN2, (WD_SO2)        | GAS(LSO2)                                                                                                                                                                           | Sulfite                                                                                       |
| L_HCO3MIN, (WD_CO2)        | GAS(LCO2)                                                                                                                                                                           | Bicarbonate                                                                                   |
| L_CO3MIN2, (WD_CO2)        | GAS(LCO2)                                                                                                                                                                           | Carbonate                                                                                     |
| L_HCOOMIN, (WD_HCOOH)      | GAS(LFOA)                                                                                                                                                                           | Formate                                                                                       |
| L_HSO4MIN, (WD_H2SO4)      | AEROSOL(LSO4, 2/3)                                                                                                                                                                  | Bisulfate                                                                                     |
| L_CAPLUS2, WD_CAPLUS2%     | AEROSOL(LCAACC, 2),<br>AERWDEP(LCAACC, 2),<br>AEROSOL(LSOILC, 3),<br>AERWDEP(LSOILC, 3),<br>AEROSOL(LANTHC, 3),<br>AERWDEP(LANTHC, 3),<br>AEROSOL(LSEASC, 3),<br>AERWDEP(LSEASC, 3) | Calcium <sup>(2+)</sup> ; %AQCHEM species include contributions from coarse aerosol           |
| L_MGPLUS2, WD_MGPLUS2%     | AEROSOL(LMGACC, 2),<br>AERWDEP(LMGACC, 2),<br>AEROSOL(LSOILC, 3),<br>AERWDEP(LSOILC, 3),<br>AEROSOL(LANTHC, 3),<br>AERWDEP(LANTHC, 3),<br>AEROSOL(LSEASC, 3),<br>AERWDEP(LSEASC, 3) | Magnesium <sup>(2+)</sup> ; %AQCHEM species include contributions from coarse aerosol         |
| L_KPLUS, WD_KPLUS%         | AEROSOL(LKACC, 2),<br>AERWDEP(LKACC, 2),<br>AEROSOL(LSOILC, 3),<br>AERWDEP(LSOILC, 3),<br>AEROSOL(LANTHC, 3),<br>AERWDEP(LANTHC, 3),<br>AEROSOL(LSEASC, 3),<br>AERWDEP(LSEASC, 3)   | Potassium <sup>(+)</sup> ; %AQCHEM species include contributions from coarse aerosol          |
| L_NAPLUS, WD_NAPLUS%       | AEROSOL(LNA, 2), AERWDEP(LNA, 2),<br>AEROSOL(LSOILC, 3),<br>AERWDEP(LSOILC, 3),<br>AEROSOL(LANTHC, 3),<br>AERWDEP(LANTHC, 3),<br>AEROSOL(LSEASC, 3),<br>AERWDEP(LSEASC, 3)          | Sodium <sup>(+)</sup> ; %AQCHEM species include contributions from coarse aerosol             |
| G_IEPOX, L_IEPOX, WD_IEPOX | GAS(LIEPOX), GASWDEP(LIEPOX)                                                                                                                                                        | Isoprene epoxydiols                                                                           |

|                            |                                        |                                                                                        |
|----------------------------|----------------------------------------|----------------------------------------------------------------------------------------|
| G_IMAE, L_IMAE, WD_IMAE    | GAS(LIMAE), GASWDEP(LIMAE)             | Methacrylic acid epoxide                                                               |
| G_IHMML, L_IHMML, WD_IHMML | GAS(LIHMML), GASWDEP(LIHMML)           | Hydroxymethylmethyl- $\alpha$ -lactone                                                 |
| L_IETET, WD_IETET          | AEROSOL(LIETET, 2), AERWDEP(LIETET, 2) | 2-methyltetrols                                                                        |
| L_IEOS, WD_IEOS            | AEROSOL(LIEOS, 2), AERWDEP(LIEOS, 2)   | IEPOX-derived organosulfate                                                            |
| L_IEON, WD_IEON**          | AEROSOL(LIEON, 2), AERWDEP(LIEON, 2)   | IEPOX-derived organonitrate. **not included in CMAQv5.1 but used here                  |
| L_DIMER, WD_DIMER          | AEROSOL(LDIMER, 2), AERWDEP(LDIMER, 2) | dimers                                                                                 |
| L_IMGA, WD_IMGA            | AEROSOL(LIMGA, 2), AERWDEP(LIMGA, 2)   | 2-methylglyceric acid                                                                  |
| L_IMOS, WD_IMOS            | AEROSOL(LIMOS, 2), AERWDEP(LIMOS, 2)   | MPAN-derived organosulfate                                                             |
| L_IMON, WD_IMON**          | AEROSOL(LIMON, 2), AERWDEP(LIMON, 2)   | MPAN-derived organonitrate. ** not included in CMAQv5.1 but used here                  |
| G_OH, L_OH*                | GAS(LHO)                               | Hydroxyl radical. *Mapped in from CMAQ but kept constant during/after cloud processing |

5 **Table S5. Box model test scenarios. Initial aerosol species concentrations are held constant for the variable scenarios and are associated with an initial droplet pH of ~5. Default gas concentrations were set at 1 ppb and modal aerosol species concentrations were set to 0.1  $\mu\text{g}/\text{m}^3$ , with the following exceptions:  $\text{O}_3 = 50$  ppb,  $\text{CO}_2 = 340$  ppm,  $\text{H}_2\text{SO}_4 = 0.1$  ppb,  $\text{N}_2\text{O}_5 = 0.1$  ppb,  $\text{SO}_4^{2-} = 4.2$   $\mu\text{g}/\text{m}^3$ , Primary inorganic (inert) = 2.1  $\mu\text{g}/\text{m}^3$ , Primary OA = 1.1  $\mu\text{g}/\text{m}^3$ , SOA = 2.1  $\mu\text{g}/\text{m}^3$ , EC = 1.1  $\mu\text{g}/\text{m}^3$ ,  $\text{Cl}^- = 2.3$   $\mu\text{g}/\text{m}^3$ ,  $\text{NH}_4^+ = 2.2$   $\mu\text{g}/\text{m}^3$ ,  $\text{NO}_3^- = 4.1$   $\mu\text{g}/\text{m}^3$ , Na, accumulation mode Fe, Mn, Ca = 0.3  $\mu\text{g}/\text{m}^3$ , coarse soil and anthropogenic coarse = 2  $\mu\text{g}/\text{m}^3$ , coarse sea salt cations = 1  $\mu\text{g}/\text{m}^3$ , Pressure = 1 atm.**

| Variable input                                 | Values                            |
|------------------------------------------------|-----------------------------------|
| Liquid Water content ( $\text{g}/\text{m}^3$ ) | 0.05, 0.1, 0.2, 0.3               |
| Precipitation rate (mm/hr)                     | 0, 2                              |
| Temperature (K)                                | 270, 283                          |
| Daylight (binary)                              | 0, 1                              |
| Integration time (s)                           | 60, 300, 720                      |
| $\text{SO}_2$ (ppb)                            | 1, 5, 10                          |
| $\text{H}_2\text{O}_2$ (ppb)                   | 0.1, 1, 5                         |
| (M)GLY (ppb)                                   | 0.5, 2                            |
| OH (ppb)                                       | $10^{-3}$ , $10^{-5}$ , $10^{-7}$ |
| $\text{NH}_3$ (ppb)                            | 1, 5                              |
| $\text{HNO}_3$ (ppb)                           | 1, 5                              |

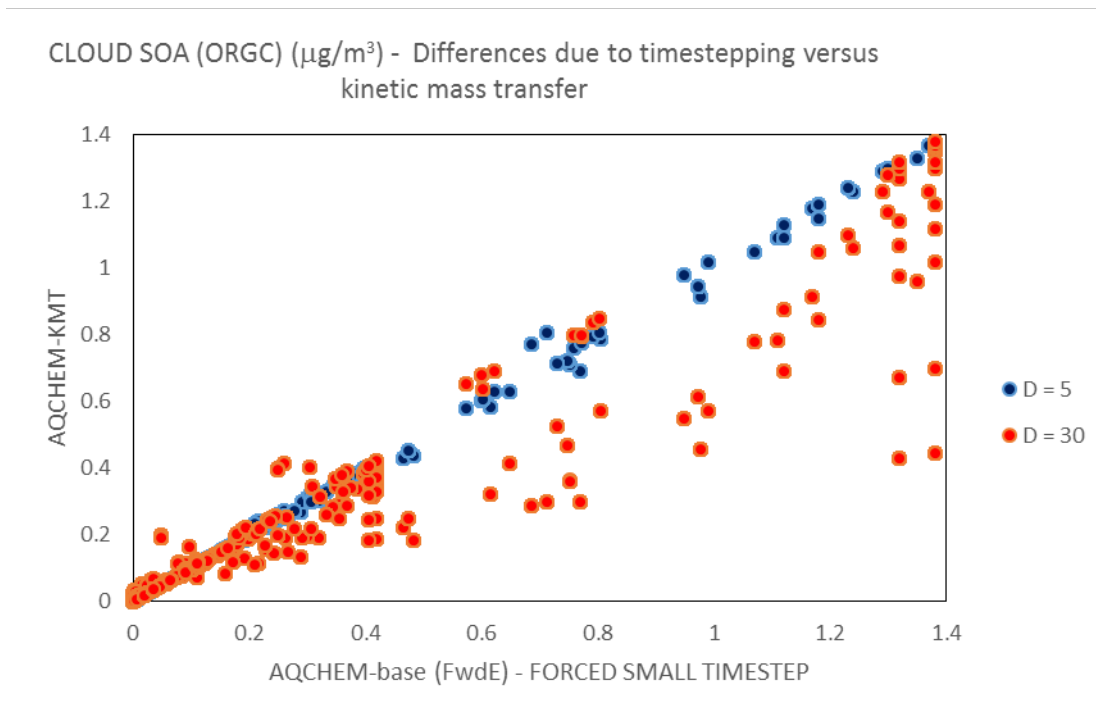

5 **Figure S1: Cloud SOA (ORGC) predicted by AQCHEM-KMT at 5 (blue) and 30  $\mu\text{m}$  (red) droplet diameters versus standard AQCHEM with a forced small time step. Compared to Figure 2 where AQCHEM is run with its standard time-stepping procedure, it appears that the differences between the models for ORGC are driven by both mass transfer limitations as well as the time-stepping procedure (which in standard AQCHEM is based on sulfate production only).**

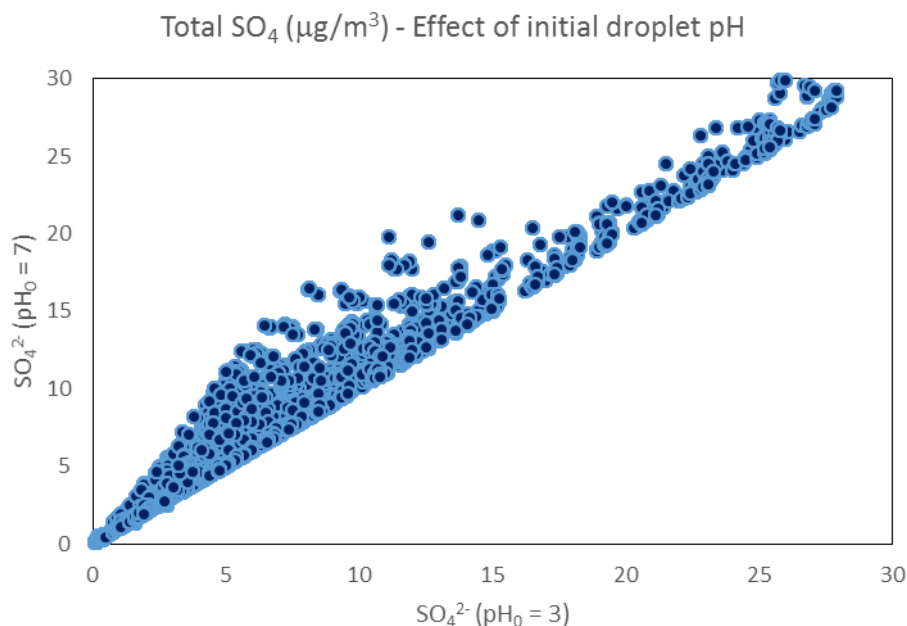

**Figure S2: Predicted SO<sub>4</sub><sup>2-</sup> concentrations for AQCHEM-KMT for initial pH of 7 versus 3.**

#### References:

- 5 Carlton, A.G., Bhawe, P.V., Napelenok, S.L., Edney, E.O., Sarwar, G., Pinder, R.W., Pouliot, G.A., and Houyoux, M.: Model representation of secondary organic aerosol in CMAQv4.7, *Environ. Sci. Technol.*, 44, 8553-8560, doi: 10.1021/es100636q, 2010.

Graedel, T.E. and Weschler, C.J.: Chemistry within aqueous atmospheric aerosols and raindrops, *Reviews of Geophysics*, 19(4), 505-539, doi:10.1029/RG019i004p00505, 1981.

- 10 Herrmann, H., Ervens, B., Jacobi, H.-W., Wolke, R., Nowacki, P., and Zellner, R.: A chemical aqueous phase radical mechanism for tropospheric chemistry, *J. Atmos. Chem.*, 36, 231–284, doi:10.1023/A:1006318622743, 2000.

Lim, H., Carlton, A.G., and Turpin, B.J.: Isoprene forms secondary organic aerosol through cloud processing: model simulations, *Environ. Sci. Technol.*, 39, 4441-4446, doi:10.1021/es048039h, 2005.

- 15 Pye, H.O.T., Pinder, R.W., Piletic, P.R., Xie, Y., Capps, S. L., Lin, Y., Surratt, J.D., Zhang, Z., Gold, A., Luecken, D.J., Hutzell, W.T., Jaoui, M., Offenberg, J.H., Kleindienst, T.E., Lewandowski M., and Edney, E.O.: Epoxide pathways improve model predictions of isoprene markers and reveal key role of acidity in aerosol formation, *Environ. Sci. Technol.*, 47, 11056-11064, doi: 10.1021/es402106h, 2013.

Seinfeld, J. H. and Pandis, S. N.: *Atmospheric Chemistry and Physics: From Air Pollution to Climate Change*, 2nd Edn., John Wiley and Sons, Inc., 2006.

- 20 Warneck, P. and Williams, J.: *The Atmospheric Chemist's Companion: Numerical Data for Use in the Atmospheric Sciences*, Springer, 2012.
